# Supplementary figures and images for: Role of SARS-CoV-2 in Altering the RNA-Binding Protein and miRNA-Directed Post-Transcriptional Regulatory Networks in Humans
Source: MDPI journal article supplement (doi:10.3390/ijms21197090), 2020-09-25

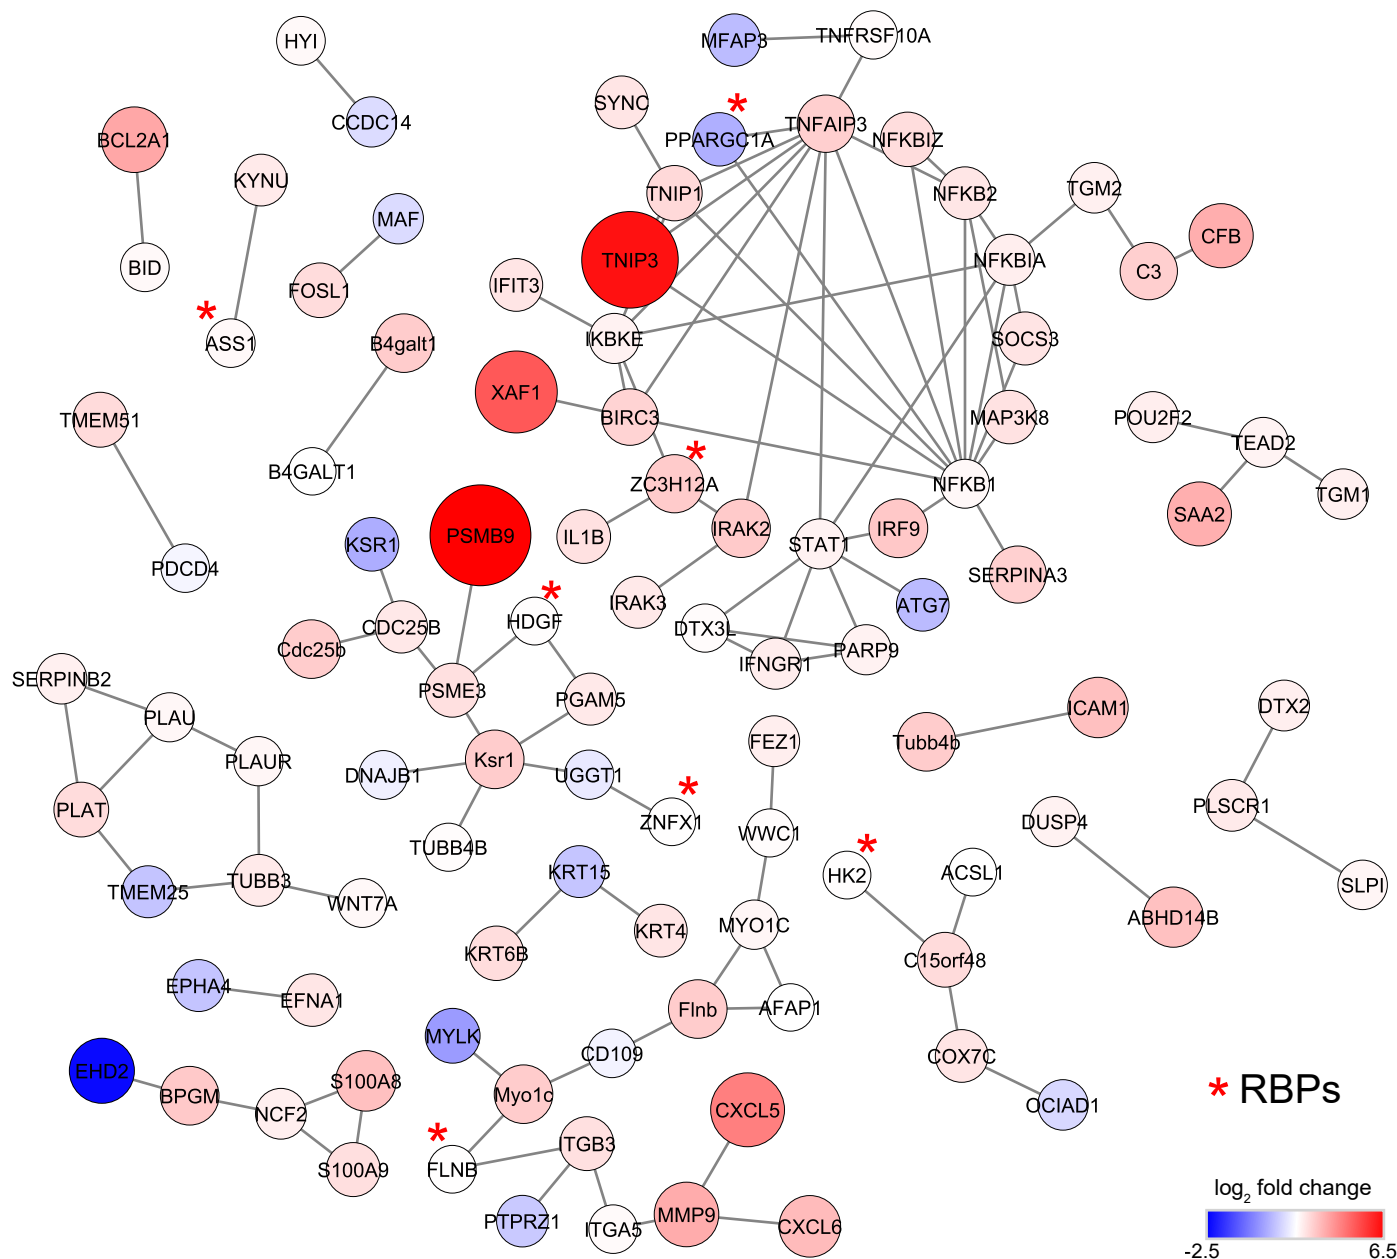

Supplement: s1 [file s1]
